# Supplementary material
Source: PubMed Central journal article supplement (PMC2743464)
Supplement: NIHMS110095-supplement-Supplementary_information.pdf [file NIHMS110095-supplement-Supplementary_information.pdf]

# Supplementary information

## Dose-response Curve Slope Sets Class-Specific Limits on Inhibitory Potential of Anti-HIV Drugs

Lin Shen<sup>1,2</sup>, Susan Peterson<sup>1</sup>, Ahmad R. Sedaghat<sup>1</sup>, Moira A. McMahon<sup>1,2</sup>,  
Marc Callender<sup>1</sup>, Haili Zhang<sup>1</sup>, Yan Zhou<sup>1</sup>, Eleanor Pitt<sup>1</sup>, Karen S. Anderson<sup>3</sup>,  
Edward P. Acosta<sup>4</sup>, Robert F. Siliciano<sup>1,5</sup>

<sup>1</sup>Department of Medicine, <sup>2</sup>Department of Pharmacology and Molecular Sciences,  
Johns Hopkins University School of Medicine, 733 N. Broadway, Baltimore, MD  
21205, USA.

<sup>3</sup>Department of Pharmacology, Yale University School of Medicine, 333 Cedar Street,  
SHM B350B, New Haven, CT 06520, USA.

<sup>4</sup>Division of Clinical Pharmacology, University of Alabama at Birmingham School of  
Medicine, 1670 University Boulevard, Birmingham, AL 35294, USA.

<sup>5</sup>Howard Hughes Medical Institute, 733 N. Broadway, Baltimore, MD 21205, USA.

Correspondence should be addressed to R.F.S. ([rsiliciano@jhmi.edu](mailto:rsiliciano@jhmi.edu)).

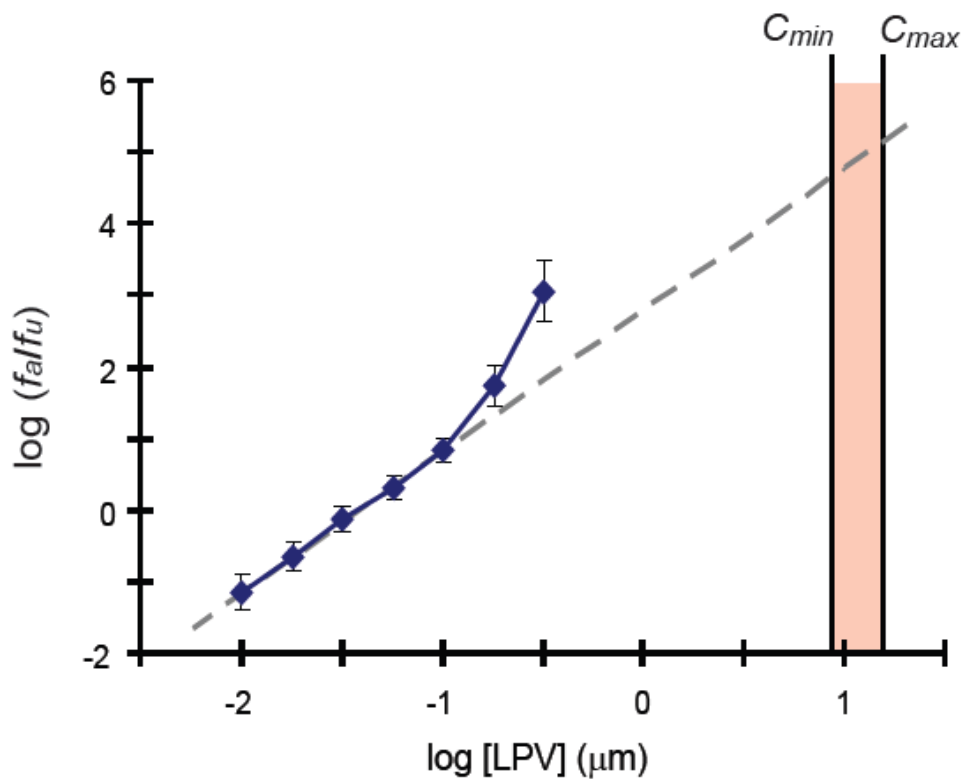

**Figure S1** Median effect plot for the protease inhibitor lopinavir (LPV). The dashed line representing the minimal slope was used for calculation of  $IC_{50}$ ,  $m$  value, and IIP. Due to the upward inflection of the curve, the actual IIP could be higher. Each data point is the mean  $\pm$  s.d. from at least three experiments. Where error bars would be hidden by the symbol, they are show at the edge of the symbol.

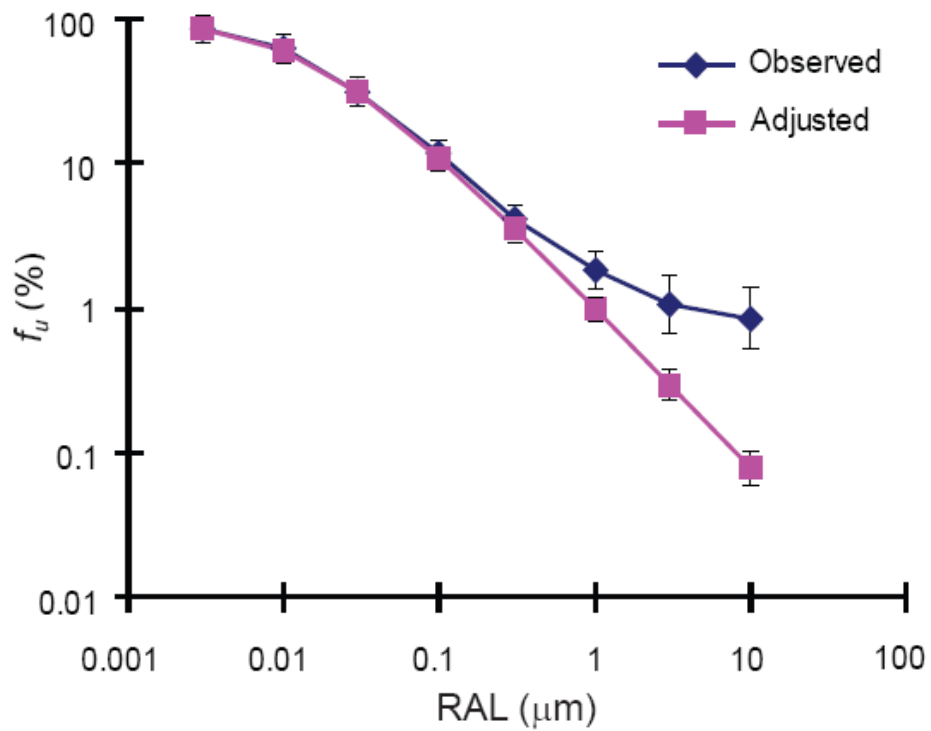

**Figure S2** Analysis of dose-response curves for raltegravir (RAL). Log-log dose-response curves for RAL are shown. The original dose-response curve (blue) based on observed percentage of GFP<sup>+</sup> cells and the adjusted dose-response curve (purple) corrected for the contribution of cells with unintegrated virus are both shown. The correction was carried out according to **Equation 6**. Each data point is the mean  $\pm$  s.d. from at least three experiments. Where error bars would be hidden by the symbol, they are shown at the edge of the symbol. IC<sub>50</sub>,  $m$  and IIP values for RAL are based on the adjusted dose-response curve.

Supplementary Table 1 Summary of Dose-response Curve Parameters of Anti-HIV-1 Drugs

| Drug                                  | IC <sub>50</sub> (nm) | <i>m</i> value | <i>r</i> <sup>2</sup> | Inhibitory Quotient <sup>a</sup>          |                                           |                                           | Instantaneous Inhibitory Potential <sup>a,b</sup> |                         |                         |
|---------------------------------------|-----------------------|----------------|-----------------------|-------------------------------------------|-------------------------------------------|-------------------------------------------|---------------------------------------------------|-------------------------|-------------------------|
|                                       |                       |                |                       | <i>C</i> <sub>min</sub> /IC <sub>50</sub> | <i>C</i> <sub>ave</sub> /IC <sub>50</sub> | <i>C</i> <sub>max</sub> /IC <sub>50</sub> | <i>C</i> <sub>min</sub>                           | <i>C</i> <sub>ave</sub> | <i>C</i> <sub>max</sub> |
| <b>NRTI</b>                           |                       |                |                       |                                           |                                           |                                           |                                                   |                         |                         |
| 3TC                                   | 29.8 ± 12.7           | 1.15 ± 0.12    | 0.987 ± 0.007         | 62.5                                      | 101.4                                     | 513.1                                     | 2.12                                              | 2.36                    | 3.17                    |
| ABC                                   | 34.4 ± 15.9           | 0.95 ± 0.15    | 0.970 ± 0.005         | 1.4                                       | 50.9                                      | 304.6                                     | 0.40                                              | 1.67                    | 2.40                    |
| AZT                                   | 182.3 ± 50.3          | 0.85 ± 0.12    | 0.988 ± 0.008         | 0.0002                                    | 2.4                                       | 24.4                                      | 0.0005                                            | 0.50                    | 1.23                    |
| d4T                                   | 552.4 ± 199.3         | 1.13 ± 0.14    | 0.986 ± 0.008         | 0.017                                     | 0.85                                      | 4.2                                       | 0.0059                                            | 0.28                    | 0.80                    |
| ddl                                   | 179.4 ± 36.3          | 1.07 ± 0.17    | 0.966 ± 0.012         | 0.0067                                    | 2.4                                       | 219.4                                     | 0.0033                                            | 0.55                    | 2.50                    |
| FTC                                   | 7.4 ± 3.0             | 1.18 ± 0.10    | 0.988 ± 0.006         | 49.0                                      | 226.9                                     | 980.3                                     | 2.03                                              | 2.81                    | 3.56                    |
| TDF <sup>c</sup>                      | 168.4 ± 37.3          | 0.97 ± 0.13    | 0.972 ± 0.013         | 2.4                                       | 2.7                                       | 6.3                                       | 0.53                                              | 0.57                    | 0.86                    |
| <b>NNRTI</b>                          |                       |                |                       |                                           |                                           |                                           |                                                   |                         |                         |
| EFV                                   | 5.4 ± 0.9             | 1.69 ± 0.08    | 0.978 ± 0.009         | 1042.5                                    | 1427.8                                    | 2401.4                                    | 5.11                                              | 5.34                    | 5.72                    |
| NVP                                   | 81.4 ± 25.4           | 1.55 ± 0.15    | 0.981 ± 0.010         | 133.7                                     | 195.6                                     | 309.0                                     | 3.30                                              | 3.56                    | 3.87                    |
| DLV                                   | 171.3 ± 76.4          | 1.56 ± 0.18    | 0.993 ± 0.005         | 62.3                                      | 101.2                                     | 158.4                                     | 2.82                                              | 3.15                    | 3.45                    |
| TMC125                                | 4.3 ± 0.7             | 1.81 ± 0.23    | 0.990 ± 0.006         | 160.0                                     | 203.4                                     | 376.0                                     | 4.00                                              | 4.19                    | 4.68                    |
| TMC278                                | 3.9 ± 0.7             | 1.92 ± 0.20    | 0.991 ± 0.006         | ND                                        | ND                                        | ND                                        | ND                                                | ND                      | ND                      |
| <b>Protease inhibitor<sup>d</sup></b> |                       |                |                       |                                           |                                           |                                           |                                                   |                         |                         |
| ATV                                   | 13.6 ± 1.6            | 2.69 ± 0.28    | 0.986 ± 0.010         | 66.1                                      | 199.8                                     | 460.6                                     | 4.91                                              | 6.20                    | 7.17                    |
| APV <sup>e</sup>                      | 144.2 ± 18.2          | 2.09 ± 0.14    | 0.990 ± 0.009         | 19.9                                      | 39.7                                      | 99.3                                      | 2.73                                              | 3.35                    | 4.18                    |
| DRV                                   | 23.6 ± 5.1            | 3.61 ± 0.32    | 0.993 ± 0.005         | 215.3                                     | 410.6                                     | 626.4                                     | 8.46                                              | 9.47                    | 10.14                   |
| IDV                                   | 90.9 ± 10.0           | 4.53 ± 0.36    | 0.982 ± 0.009         | 20.1                                      | 60.0                                      | 137.6                                     | 5.91                                              | 8.06                    | 9.69                    |
| LPV                                   | 35.8 ± 7.2            | 2.05 ± 0.12    | 0.992 ± 0.005         | 244.6                                     | 343.2                                     | 435.8                                     | 4.91                                              | 5.21                    | 5.43                    |
| NFV                                   | 166.8 ± 44.8          | 1.81 ± 0.23    | 0.987 ± 0.010         | 13.7                                      | 21.5                                      | 30.6                                      | 2.07                                              | 2.43                    | 2.70                    |
| SQV                                   | 45.3 ± 4.4            | 3.68 ± 0.23    | 0.995 ± 0.006         | 19.8                                      | 120.0                                     | 293.2                                     | 4.78                                              | 7.66                    | 9.09                    |
| TPV                                   | 242.0 ± 43.6          | 2.51 ± 0.36    | 0.993 ± 0.005         | 147.1                                     | 244.5                                     | 320.6                                     | 5.45                                              | 6.01                    | 6.30                    |

| Drug                       | IC <sub>50</sub> (nm) | <i>m</i> value           | <i>r</i> <sup>2</sup> | Inhibitory Quotient <sup>a</sup>           |                                            |                                            | Instantaneous Inhibitory Potential <sup>a,b</sup> |                         |                         |
|----------------------------|-----------------------|--------------------------|-----------------------|--------------------------------------------|--------------------------------------------|--------------------------------------------|---------------------------------------------------|-------------------------|-------------------------|
|                            |                       |                          |                       | <i>C</i> <sub>min</sub> / IC <sub>50</sub> | <i>C</i> <sub>ave</sub> / IC <sub>50</sub> | <i>C</i> <sub>max</sub> / IC <sub>50</sub> | <i>C</i> <sub>min</sub>                           | <i>C</i> <sub>ave</sub> | <i>C</i> <sub>max</sub> |
| <b>Fusion inhibitor</b>    |                       |                          |                       |                                            |                                            |                                            |                                                   |                         |                         |
| T20                        | 35.9 ± 6.8            | 1.65 ± 0.14              | 0.992 ± 0.002         | 20.5                                       | 25.1                                       | 30.9                                       | 2.17                                              | 2.31                    | 2.46                    |
| T1249                      | 11.2 ± 4.6            | 1.97 ± 0.17              | 0.966 ± 0.007         | ND                                         | ND                                         | ND                                         | ND                                                | ND                      | ND                      |
| <b>Integrase inhibitor</b> |                       |                          |                       |                                            |                                            |                                            |                                                   |                         |                         |
| L870812                    | 228.2 ± 91.1          | 0.99 ± 0.08              | 0.995 ± 0.003         | ND                                         | ND                                         | ND                                         | ND                                                | ND                      | ND                      |
| RAL                        | 14.9 ± 1.8            | 1.10 ± 0.05 <sup>f</sup> | 0.987 ± 0.007         | 13.6                                       | 89.8                                       | 268.2                                      | 1.27                                              | 2.15                    | 2.67                    |
| GS9137                     | 28.1 ± 12.3           | 0.95 ± 0.04              | 0.989 ± 0.005         | 10.7                                       | 29.2                                       | 59.1                                       | 1.04                                              | 1.43                    | 1.71                    |
| L240                       | 15.2 ± 4.0            | 1.24 ± 0.12 <sup>f</sup> | 0.992 ± 0.006         | ND                                         | ND                                         | ND                                         | ND                                                | ND                      | ND                      |
| L525                       | 86.1 ± 24.0           | 1.00 ± 0.06              | 0.989 ± 0.004         | ND                                         | ND                                         | ND                                         | ND                                                | ND                      | ND                      |

Values are means ± s.d. where available.

<sup>a</sup>The *C*<sub>min</sub>, *C*<sub>ave</sub> and *C*<sub>max</sub> values used for calculation were obtained from supplementary reference (1) for the following drugs: AZT, d4T, 3TC, ddI, NVP, DLV, ATV, NFV, IDV, and SQV. The *C*<sub>min</sub>, *C*<sub>ave</sub> and *C*<sub>max</sub> values used for calculation were obtained from FDA package insert for the following drugs: ABC, FTC, TDF, EFV, TMC125, APV, LPV, TPV, and T20. The *C*<sub>min</sub>, *C*<sub>ave</sub> and *C*<sub>max</sub> values for DRV, RAL and GS9137 were obtained from supplementary references (2)–(4) respectively. The IQ and IIP values for TMC278, T1249, L870812, L240, and L525 are not determined (ND) because their *C*<sub>min</sub>, *C*<sub>ave</sub> and *C*<sub>max</sub> values are not available.

<sup>b</sup>An IIP value > 3.5 indicates calculation from extrapolation.

<sup>c</sup>For TDF, IC<sub>50</sub> and *m* values in the Table are for tenofovir. IIP values were calculated based on the *C*<sub>min</sub>, *C*<sub>ave</sub> and *C*<sub>max</sub> plasma levels of tenofovir in subjects taking the standard dose of the prodrug TDF.

<sup>d</sup>Except where indicated in **Fig 4b,c** and for NFV, the IIP values for the protease inhibitors are calculated based on plasma levels with ritonavir boosting.

<sup>e</sup>For APV, IC<sub>50</sub> and *m* values in the Table were measured using APV. IIP values were calculated based on the *C*<sub>min</sub>, *C*<sub>ave</sub> and *C*<sub>max</sub> plasma levels of APV in subjects taking the standard dose of the prodrug fosamprenavir.

<sup>f</sup>The *m* values reported for RAL and L240 were adjusted by **Equation 6**.

## Supplementary notes

### The decay of IIP as a function of time

Assuming that subsequent doses are missed, drug concentration decreases according to first order elimination, then

$$C_t = C_{\max} e^{-kt} \quad (7)$$

where  $k$  is the elimination rate constant ( $k = \ln(2) / t_{1/2}$ ),  $t$  is the time after  $C_{\max}$  is reached, and  $t_{1/2}$  is the half life of the drug.

Combining **Equations 3–5** and **Equation 7**, the decay rate of IIP can be expressed as follows:

$$\frac{d}{dt} (IIP) = \frac{1}{\ln(10)} \bullet \frac{-mk \left( \frac{C_{\max}}{IC_{50}} \right)^m e^{-mkt}}{1 + \left( \frac{C_{\max}}{IC_{50}} \right)^m e^{-mkt}} \quad (8)$$

In this system,  $m$  ranges from about 1 to 5, and in general  $C_{\max} \gg IC_{50}$

Therefore, if  $t < 1/mk$ , **Equation 8** can be simplified as follows:

$$\frac{d}{dt} (IIP) \approx \frac{-mk}{\ln(10)} \approx -0.3 \bullet \frac{m}{t_{1/2}} \quad (9)$$

Therefore, the initial decay rate of IIP is faster if  $m$  is large and  $t_{1/2}$  is small.

$t_{1/2}$  values were obtained from FDA package insert or from references (1)–(4).

### Source of clinical trial data

The data from clinical trials used in **Fig. 4c** are as followed: ACTG 5095 Gulick, 2004<sup>5</sup>; 2NN van Leth, 2004<sup>6</sup>; DuPont006 Staszewski, 1999<sup>7</sup>; ACTG 384 Robbins, 2003<sup>8</sup>; BMS034 Squires, 2004<sup>9</sup>; ACTG 5142 Riddler, 2008<sup>10</sup>; ARTEMIS Ortiz,

2008<sup>11</sup>; TITAN Madruga, 2007<sup>12</sup>; KLEAN Eron, 2006<sup>13</sup>; CASTLE Molina, 2008<sup>14</sup>; M98-863 Walmsley, 2002<sup>15</sup>; NEAT Rodriguez-French, 2004<sup>16</sup>.

### **IIP is only one of the factors that contribute to clinical outcome**

The promising new integrase inhibitor RAL<sup>17</sup>, when used together with the NRTIs tenofovir disoproxil fumarate (TDF) and lamivudine, causes a faster initial decline in viral load than a comparable EFV-based regimen<sup>18</sup>. A potential explanation for this rapid drop in viral load despite a relatively low IIP is that the drop in viral load may reflect the fact that RAL acts later in the virus life cycle, leaving a population of infected cells that already have integrated proviruses and that have a faster average decay rate<sup>19</sup>. Note that for this analysis, protease inhibitors may be considered to act at the beginning of the life cycle since virions that have completed maturation when the protease inhibitors are started can still infect cells and those cells can go on to produce immature virus particles before the block imposed by the drug is encountered again. Therefore, for the current five clinically available drug classes, protease inhibitors act as the earliest stage of the virus life cycle, whereas integrase inhibitors act at the latest stage of the virus life cycle. Thus the rapid drop in viral load does not necessarily indicate greater antiviral activity. Despite a relatively low IIP, RAL may prove to be an excellent antiretroviral drug because of its favorable side effect profile, activity against viruses resistant to protease inhibitors or reverse transcriptase inhibitors<sup>18,20</sup>, and potentially for other reasons related to drug distribution and synergy.

For the NRTIs, it is also necessary to consider the levels and decay rates of the

active, intracellular triphosphate forms of these drugs, which are very different from those of the prodrugs<sup>1</sup>. The low values of  $IIP_{C_{min}}$  for NRTIs are due to low  $C_{min}$  values for the prodrugs, reflecting their rapid clearance from the plasma. Despite the relatively low  $IIP_{C_{min}}$  of NRTIs, these drugs are clinically useful in part because the active triphosphate forms of some NRTIs have very long intracellular half lives (e.g. for TDF, the active intracellular form has a half life >60 h)<sup>1</sup>.

### References for supplementary notes

1. Acosta, E. P., Gerber, J. G. & Kuritzkes, D. R. in *Antiretroviral Pharmacokinetics, Resistance Testing and Therapeutic Drug Monitoring* (eds Libman, H. & Makadon, H. J.) (American College of Physicians (ACP) Therapy Series: HIV, 2006).
2. Boffito, M. *et al.* Pharmacokinetics and antiretroviral response to darunavir/ritonavir and etravirine combination in patients with high-level viral resistance. *AIDS* **21**, 1449-1455 (2007).
3. Markowitz, M. *et al.* Antiretroviral activity, pharmacokinetics, and tolerability of MK-0518, a novel inhibitor of HIV-1 integrase, dosed as monotherapy for 10 days in treatment-naïve HIV-1-infected individuals. *J. Acquir. Immune Defic. Syndr.* **43**, 509-515 (2006).
4. DeJesus, E. *et al.* Antiviral activity, pharmacokinetics, and dose response of the HIV-1 integrase inhibitor GS-9137 (JTK-303) in treatment-naïve and treatment-experienced patients. *J. Acquir. Immune Defic. Syndr.* **43**, 1-5 (2006).
5. Gulick, R. M. *et al.* Triple-nucleoside regimens versus efavirenz-containing regimens for the initial treatment of HIV-1 infection. *N. Engl. J. Med.* **350**, 1850-1861 (2004).
6. van Leth, F. *et al.* Comparison of first-line antiretroviral therapy with regimens including nevirapine, efavirenz, or both drugs, plus stavudine and lamivudine: a randomised open-label trial, the 2NN Study. *Lancet* **363**, 1253-1263 (2004).
7. Staszewski, S. *et al.* Efavirenz plus zidovudine and lamivudine, efavirenz plus indinavir, and indinavir plus zidovudine and lamivudine in the treatment of HIV-1 infection in adults. Study 006 Team. *N. Engl. J. Med.* **341**, 1865-1873 (1999).
8. Robbins, G. K. *et al.* Comparison of sequential three-drug regimens as initial



- therapy for HIV-1 infection. *N. Engl. J. Med.* **349**, 2293-2303 (2003).
9. Squires, K. *et al.* Comparison of once-daily atazanavir with efavirenz, each in combination with fixed-dose zidovudine and lamivudine, as initial therapy for patients infected with HIV. *J. Acquir. Immune Defic. Syndr.* **36**, 1011-1019 (2004).
  10. Riddler, S. A. *et al.* Class-sparing regimens for initial treatment of HIV-1 infection. *N. Engl. J. Med.* **358**, 2095-2106 (2008).
  11. Ortiz, R. *et al.* Efficacy and safety of once-daily darunavir/ritonavir versus lopinavir/ritonavir in treatment-naïve HIV-1-infected patients at week 48. *AIDS* (in press).
  12. Madruga, J. V. *et al.* Efficacy and safety of darunavir-ritonavir compared with that of lopinavir-ritonavir at 48 weeks in treatment-experienced, HIV-infected patients in TITAN: a randomised controlled phase III trial. *Lancet* **370**, 49-58 (2007).
  13. Eron, J., Jr *et al.* The KLEAN study of fosamprenavir-ritonavir versus lopinavir-ritonavir, each in combination with abacavir-lamivudine, for initial treatment of HIV infection over 48 weeks: a randomised non-inferiority trial. *Lancet* **368**, 476-482 (2006).
  14. Molina, J. *et al.* Efficacy and safety of once-daily atazanavir/ritonavir compared to twice-daily lopinavir/ritonavir, each in combination with tenofovir and emtricitabine in ARV-naïve HIV-1-infected subjects: the CASTLE study, 48-week results. *15<sup>th</sup> CROI Abstract No. 37* (2008).
  15. Walmsley, S. *et al.* Lopinavir-ritonavir versus nelfinavir for the initial treatment of HIV infection. *N. Engl. J. Med.* **346**, 2039-2046 (2002).
  16. Rodriguez-French, A. *et al.* The NEAT study: a 48-week open-label study to compare the antiviral efficacy and safety of GW433908 versus nelfinavir in antiretroviral therapy-naïve HIV-1-infected patients. *J. Acquir. Immune Defic. Syndr.* **35**, 22-32 (2004).
  17. Hazuda, D. J. *et al.* Inhibitors of strand transfer that prevent integration and inhibit HIV-1 replication in cells. *Science* **287**, 646-650 (2000).
  18. Markowitz, M. *et al.* Rapid and Durable Antiretroviral Effect of the HIV-1 Integrase Inhibitor Raltegravir as Part of Combination Therapy in Treatment-Naïve Patients With HIV-1 Infection: Results of a 48-Week Controlled Study. *J. Acquir. Immune Defic. Syndr.* **46**, 125-133 (2007).
  19. Sedaghat, A. R., Dinoso, J. B., Shen, L., Wilke, C. O. & Siliciano, R. F. Decay dynamics of HIV-1 depend on the inhibited stages of the viral life cycle. *Proc. Natl. Acad. Sci. U. S. A.* **105**, 4832-4837 (2008).

20. Grinsztejn, B. *et al.* Safety and efficacy of the HIV-1 integrase inhibitor raltegravir (MK-0518) in treatment-experienced patients with multidrug-resistant virus: a phase II randomised controlled trial. *Lancet* **369**, 1261-1269 (2007).
